# Supplementary material for: Review: visual analytics of climate networks
Source: Copernicus journal article supplement (doi:10.5194/npg-22-545-2015), 2015-09-23
Supplement: Supplementary file [file npg-22-545-2015-supplement-title-page.pdf › npg-22-545-2015-supplement-title-page.pdf]

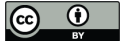

## *Supplement of*

## **Review: visual analytics of climate networks**

**T. Nocke et al.**

*Correspondence to:* T. Nocke (nocke@pik-potsdam.de)

- [npg-22-545-2015-supplement-title-page.pdf](#)
- [climate\\_backbone\\_network\\_gtx.webm](#)

The copyright of individual parts of the supplement might differ from the CC-BY 3.0 licence.
